# Supplementary material for: A proof-of-concept study in small and large animal models for coupling liver normothermic machine perfusion with mesenchymal stromal cell bioreactors
Source: Springer Nature journal article supplement (doi:10.1038/s41467-024-55217-7), 2025-01-02
Supplement: MOESM1 [file 41467_2024_55217_MOESM1_ESM.pdf]

# Supplementary information

ARTICLE TITLE: Coupling liver normothermic machine perfusion with mesenchymal stromal cell bioreactors: a proof of concept study in small and large animal models

Umberto Cillo 1#, Caterina Lonati 2\*#, Alessandra Bertacco 1, Lucrezia Magnini 2, Michele Battistin 2, Liver NMP Consortium §, Lara Borsetto 1, Francesco Dazzi 3, David Al-Adra 4, Enrico Gringeri 1, Maria Laura Bacci 5, Andrea Schlegel 2,6, Daniele Dondossola 7,8

§ Liver NMP Consortium: Andrea Carlin 8, Margherita Carbonaro 7, Domenico Ventrella 5, Camilla Anibaldi 5, Alberto Elmi 5,9

## Affiliations

1 Transplantation and Hepatobiliary Surgery, University of Padova, Padua, Italy

2 Center for Preclinical Research, Fondazione IRCCS Ca' Granda Ospedale Maggiore Policlinico, Via Pace 9, 20100 Milan, Italy

3 School of Cardiovascular and Metabolic Medicine & Sciences, King's College London, London, UK.

4 Division of Transplantation, Department of Surgery, University of Wisconsin School of Medicine and Public Health, Madison, WI

5 Department of Veterinary Medical Sciences, University of Bologna, Italy

6 Transplantation Center, Digestive Disease and Surgery Institute, Department of Immunity and Inflammation, Lerner Research Institute, Cleveland Clinic, Cleveland, OH 44106, USA

7 General and Liver Transplant Surgery Unit, Fondazione IRCCS Ca' Granda Ospedale Maggiore Policlinico, Via Francesco Sforza 35, 20100 Milan, Italy

8 Department of Pathophysiology and Transplantation, University of Milan, Via Francesco Sforza 35, 20100 Milan, Italy

9 Department of Veterinary Sciences, University of Pisa, Italy

## Table of Contents

|                                                                                                                                         |           |
|-----------------------------------------------------------------------------------------------------------------------------------------|-----------|
| <b>1. Supplementary methods.....</b>                                                                                                    | <b>5</b>  |
| <b>1.1. Isolation of adipose tissue (AT)-mesenchymal stromal cells (MSCs) and cell culturing before MSC-bioreactor preparation.....</b> | <b>5</b>  |
| <b>1.2. Bioreactor description.....</b>                                                                                                 | <b>5</b>  |
| <b>1.3. Liverless perfusion using the NMP platform for small animal models.....</b>                                                     | <b>5</b>  |
| <b>1.4. Analysis performed on bioreactor supernatants and perfusate samples collected during liverless NMP.....</b>                     | <b>6</b>  |
| 1.4.1. Perfusate sample processing.....                                                                                                 | 6         |
| 1.4.2. Human Indoleamine 2,3-Dioxygenase (IDO).....                                                                                     | 6         |
| 1.4.3. Human caspase-cleaved keratin 18 (CK18).....                                                                                     | 6         |
| 1.4.4. Total nitric oxide (NO) metabolites.....                                                                                         | 7         |
| 1.4.5. Assessment of 8-hydroxy-2'-deoxyguanosine (8-OHdG).....                                                                          | 7         |
| <b>1.5. Cell detachment from the bioreactor and flow-citometry.....</b>                                                                 | <b>7</b>  |
| <b>1.6. Animals and sample size calculation for the rat model.....</b>                                                                  | <b>8</b>  |
| <b>1.7. Anesthesia, Surgery, In-situ Perfusion, and rat liver procurement.....</b>                                                      | <b>8</b>  |
| <b>1.8. Rat liver normothermic perfusion.....</b>                                                                                       | <b>9</b>  |
| <b>1.9. Processing of perfusate samples collected during rat liver NMP.....</b>                                                         | <b>10</b> |
| <b>1.10. Comparative analysis of perfusates collected during liverless NMP and rat liver NMP.....</b>                                   | <b>11</b> |
| 1.10.1. Human IL-4, IL-6, IL-10, IL-13, IL-1ra, IL-36-beta, Galectin-3 and CCL-2/MCP-1.....                                             | 11        |
| 1.10.2. Human Galectin-9.....                                                                                                           | 11        |
| 1.10.3. Human IL-8, IL-33, and IL-18.....                                                                                               | 11        |
| 1.10.4. Analysis of extracellular vesicles (EVs) released in the perfusate.....                                                         | 11        |
| <b>1.11. Analysis of perfusate samples collected during rat liver NMP.....</b>                                                          | <b>12</b> |
| 1.11.1. Succinate.....                                                                                                                  | 12        |
| 1.11.2. NADH.....                                                                                                                       | 12        |
| 1.11.3. Molecules relevant to tissue damage, inflammation and resolution.....                                                           | 12        |
| 1.11.4. Rat Tissue Inhibitor of Metalloproteinase 1 (TIMP-1).....                                                                       | 13        |
| 1.11.5. Rat IL-13, Hepatocyte growth factor (HGF).....                                                                                  | 13        |
| <b>1.12. Evaluations performed on rat liver biopsies.....</b>                                                                           | <b>13</b> |
| 1.12.1. Wet-to-Dry Ratio.....                                                                                                           | 13        |
| 1.12.2. ATP content assessment.....                                                                                                     | 13        |
| 1.12.3. Determination of ATP derivatives by High-performance liquid chromatography.....                                                 | 14        |

|                                                                                                                      |           |
|----------------------------------------------------------------------------------------------------------------------|-----------|
| 1.12.4. Tissue NAD <sup>+</sup> /NADH content measurement .....                                                      | 14        |
| <b>1.13. Porcine model of Donation after cardiocirculatory death (DCD) and liver NMP.....</b>                        | <b>14</b> |
| 1.13.1. Sample size.....                                                                                             | 14        |
| 1.13.2. Preparation of the bioreactor suitable for porcine livers .....                                              | 14        |
| 1.13.3. Anesthesia, surgery, liver procurement .....                                                                 | 15        |
| 1.13.4. Protocol for porcine liver NMP .....                                                                         | 15        |
| <b>2. Supplementary results.....</b>                                                                                 | <b>17</b> |
| 2.1. Preliminary characterization of MSCs isolated from adipose tissue.....                                          | 17        |
| 2.2. Transmembrane pressure during liverless NMP.....                                                                | 17        |
| 2.3. Gas analysis during liverless NMP .....                                                                         | 17        |
| 2.4. EVs suspended in the perfusates during rat liver NMP .....                                                      | 17        |
| 2.5. Release of Human CK18 during liverless and rat liver NMP .....                                                  | 17        |
| 2.6. Hemodynamics during rat liver NMP .....                                                                         | 17        |
| 2.7. Gas analysis of perfusate samples collected during rat liver NMP .....                                          | 18        |
| 2.8. Analysis of the bile produced during rat liver NMP .....                                                        | 18        |
| 2.9. NAD <sup>+</sup> /NADH evaluation .....                                                                         | 18        |
| 2.10. Characterization of the MSCs harvested from the bioreactors after liver NMP.....                               | 18        |
| <b>3. Supplementary Tables .....</b>                                                                                 | <b>19</b> |
| Supplementary Table 1. Experimental design adopted to perform rat liver NMP.....                                     | 19        |
| Supplementary Table 2. Gas analysis of MSC-bioreactor supernatants .....                                             | 20        |
| Supplementary Table 3. Timings of sample collection during rat liver NMP .....                                       | 21        |
| Supplementary Table 4. Biochemical analysis of perfusate samples collected throughout porcine liver NMP .....        | 22        |
| Supplementary Table 5. Gas analysis of the perfusate during porcine liver NMP .....                                  | 24        |
| Supplementary Table 6. Histological evaluation of tissue biopsies collected before and after porcine liver NMP ..... | 25        |
| <b>4. Supplementary Figures .....</b>                                                                                | <b>26</b> |
| Supplementary Figure 1. MSC-bioreactors utilized to develop the advanced NMP platform for small animal models .....  | 26        |

|                                                                                                                                                           |           |
|-----------------------------------------------------------------------------------------------------------------------------------------------------------|-----------|
| Supplementary Figure 2. Transmembrane pressure during liverless NMP.....                                                                                  | 27        |
| Supplementary Figure 3. Gas analysis during liverless NMP.....                                                                                            | 28        |
| Supplementary Figure 4. Extracellular vesicles released during rat liver-NMP .....                                                                        | 29        |
| Supplementary Figure 5. Release of Human CK18 during liverless- and rat liver-NMP .....                                                                   | 30        |
| Supplementary Figure 6. Hemodynamics parameters during rat liver NMP .....                                                                                | 31        |
| Supplementary Figure 7. Gas analysis of perfusate samples collected during rat liver NMP.....                                                             | 32        |
| Supplementary Figure 8. NAD <sup>+</sup> and NADH content in rat liver homogenates and perfusate samples...                                               | 34        |
| Supplementary Figure 9. Plasmafilters used to implement the advanced NMP platform for large animals .....                                                 | 35        |
| Supplementary Figure 10. Connection of the human plasmafilter to the Liver Assist <sup>®</sup> perfusion platform.....                                    | 36        |
| Supplementary Figure 11. Perfusate pH during porcine liver NMP.....                                                                                       | 37        |
| Supplementary Figure 12. Histological pictures of tissue biopsies collected before and after porcine liver NMP performed with the advanced platform ..... | 38        |
| <b>5. References.....</b>                                                                                                                                 | <b>39</b> |

# 1. Supplementary methods

## 1.1. Isolation of adipose tissue (AT)-mesenchymal stromal cells (MSCs) and cell culturing before MSC-bioreactor preparation

Subcutaneous adipose tissue (SAT) of the abdominal region was collected during abdominoplasty (Padua Ethical Committee for Clinical Research approval number: 2892P, 10/06/2013). SAT was minced and digested in collagenase type II solution (1 mg/ml) (Merck KGaA, Darmstadt, Germany) at 37 °C in a water bath with medium shaking for 1 hour. The digested AT was mixed by pipetting, serially centrifuged at 350g for 10 min and filtered through 100 µm cell strainer (Falcon, Corning, NY, USA) to remove collagen fibers and debris. Red blood cells were removed by 5 min incubation of cellular pellet with standard lysis buffer. Cells of the stromal vascular fraction were counted in a Neubauer chamber upon Trypan Blue (0.4%) staining, seeded in DMEM F12 10% FBS (Gibco, Thermo Fisher Scientific, Waltham, MA USA) and grown at 37 °C and 5% CO<sub>2</sub>. Adipose tissue (AT)-derived MSC) were obtained by subculturing.

To produce the adequate cell amount to be seeded into the bioreactor, AT-MSCs were expanded in 75cm<sup>2</sup> tissue culture flasks (Sarstedt AG & Co. KG, Numbrecht, Germany), at a concentration of 14.3\*10<sup>4</sup> cells/ml in 14 mL of αMEM medium (Gibco, Thermo Fisher Scientific) added with 5% Human platelet lysate (SCM142, Merck KGaA), 2 mM L-glutamine, 100 U/ml penicillin, 100 µg/ml streptomycin, and 100 µg/ml Amphotericin B (Thermo Fisher Scientific). Cells were expanded for 14 days, with medium substitution every 2 days. At 80% confluence, cells were enzymatically harvested and counted. Cells within passages 2 to 8 (P2 to P8) were exclusively utilized to minimize variability.

## 1.2. Bioreactor description

The hollow fiber bioreactors (Aferetica srl, Bologna, Italy; Supplementary Figure 1) used in the present research show a cylindrical structure containing bundles of polysulfone fibers to create a surface area suitable for cell growth. There are two distinct compartments: the intracapillary space, which is inside the hollow fibers, and the extracapillary space, which surrounds the fibers within the chamber. The fibers provide a total culturing surface of 500 cm<sup>2</sup> and are composed of membranes with pores measuring 150 nm in diameter. Media flows through the fibers (intracapillary space), while cells are typically cultured in the extracapillary space. This setup allows a selective exchange of molecules and factors between the compartments.

## 1.3. Liverless perfusion using the NMP platform for small animal models

Liverless perfusion experiments were performed using a customized NMP circuit. It consists of a heated glass reservoir (Harvard Apparatus, Holliston, MA, USA), PVC tubing (BD Switzerland Sarl,

34 Eysins, Switzerland), a peristaltic pump (Ismatec, Wertheim, Germany), a single-use membrane  
35 oxygenator (Micro-1, Kewei Rising Medical, Shenzhen, China) and a heated bubble trap (Harvard  
36 apparatus). The perfusion fluid was prepared using the following reagents: Williams Medium E  
37 (Gibco, Thermo Fisher Scientific), human albumin (Grifols S.A. Barcelona, Spain), L-glutamine  
38 (Gibco, Thermo Fisher Scientific), Antibiotic-Antimycotic (Streptomycin, Amphotericin B,  
39 Penicillin, Gibco), insulin (Humalog, Eli Lilly, Utrecht, Netherlands), N-acetylcysteine (Zambon  
40 Italia, Bresso, Italy), and sodium taurocholate (Organox, Oxford, UK).

41 Then, 46.2 ml of Oxyglobin® (HBO2 Therapeutics, Souderton, PA, USA), a veterinary-licensed  
42 bovine-derived haemoglobin, was added to the solution to reach a final volume of 120 ml. Once the  
43 MSC-bioreactors were connected to the circuit, the perfusion fluid was pumped inside the fibers, with  
44 20 ml/min flow rate. To enhance exchange between the 2 compartments of the bioreactor, continuous  
45 countercurrent flows of 5 ml/min were adopted outside the fibers.

#### 46 **1.4. Analysis performed on bioreactor supernatants and perfusate samples** 47 **collected during liverless NMP**

48 Perfusates were used to assess the concentration of the following molecules of human origin:  
49 Indoleamine 2,3-Dioxygenase (IDO), caspase-cleaved keratin 18 (CK18), Galectin-9, Interleukin  
50 (IL)-8, IL-33, IL-18, IL-1ra, and nitric oxide (NO).

##### 51 *1.4.1. Perfusate sample processing*

52 Perfusate samples were centrifugated at 733 g for 10 min at 4°C (Heraeus Multifuge X3R, Thermo  
53 Fisher Scientific). Supernatants were collected and purified with Amicon Ultra 100K centrifugal filter  
54 devices (Millipore, Merck KGaA) to avoid colorimetric interferences possibly given by Oxyglobin®.  
55 Briefly, 500 µl of each sample were loaded onto the columns and centrifuged at 19357 rpm for 15  
56 min (Heraeus Multifuge X3R). Next, eluates were collected and stored at -80°C for subsequent  
57 biomolecular analysis.

##### 58 *1.4.2. Human Indoleamine 2,3-Dioxygenase (IDO)*

59 The amount of Indoleamine 2,3-Dioxygenase (IDO), was investigated in perfusates and supernatants  
60 using a Human Elisa Kit (Invitrogen, Thermo Fisher Scientific). Standards were prepared with a serial  
61 dilution ranging from 200 ng/ml to 0.819 ng/ml. Absorbance readings at 450 nm was performed using  
62 a multi-mode microplate reader (Synergy HTX, Biotek U.S, Winooski, VT, USA).

##### 63 *1.4.3. Human caspase-cleaved keratin 18 (CK18)*

64 The M30 Elisa kit (VLVbio AB, Nacka, Stockholm, Sweden) is an immunoassay for quantitative  
65 determination of the caspase-cleaved keratin 18. The M30 antibody recognizes a neo-epitope exposed  
66 after caspase cleavage of K18 fragments containing the K18Asp396 neo-epitope. Standard curve

67 range was from 1.56 mU/ml to 100 mU/ml. Absorbance readings at 450 nm was performed using a  
68 multi-mode microplate reader (Synergy HTX).

#### 69 *1.4.4. Total nitric oxide (NO) metabolites*

70 Concentration of nitric oxide (NO) was evaluated through assessment of total nitrites and nitrates  
71 using Griess reagent. A colorimetric commercially available kit with a detection range of 10–100  $\mu$ M  
72 was utilized (Sigma-Aldrich, Merck KGaA). Samples were loaded into Amicon Ultra 10 K  
73 centrifugal filter devices (Millipore, Merck KGaA) and then subjected to 15-min centrifugation at  
74 14,000 g (Heraeus Multifuge X3R). Next, protein- and hemoglobin-free eluates were added to a  
75 nitrate reductase according to manufacturer's instructions. Absorbance readings at 450 nm was  
76 performed using a multi-mode microplate reader (Synergy HTX).

#### 77 *1.4.5. Assessment of 8-hydroxy-2'-deoxyguanosine (8-OHdG)*

78 Generation of the oxidized form of 2'-deoxyguanosine was determined to assess the occurrence of  
79 oxidative damage to DNA (DNA damage competitive ELISA, Thermo Fisher Scientific). Absorbance  
80 reading was performed at 450 nm using a multi-mode microplate reader (Synergy HTX).

### 81 **1.5. Cell detachment from the bioreactor and flow-citometry**

82 At the end of NMP, MSC-bioreactors were washed with 500 ml of PBS 1x. Then, the devices were  
83 disconnected from the circuit and were subjected to enzymatic digestion using 0.25% Trypsin-EDTA  
84 (Thermo Fisher Scientific) at 37°C, with vortex mixing at 17 g every 10 min. After 30 min-incubation,  
85 supernatants were collected and centrifuged at 413 g for 10 min at 4°C 2 ml PBS 1x. Cell pellets were  
86 suspended in 2 ml PBS 1x and counted using the Scepter™ cell counter (Merck KGaA) equipped  
87 with 60  $\mu$ m sensors. Average yield was  $10^6$  cells. Next, MSCs were cultured in vitro until 90%  
88 confluence. Culturing conditions were similar to those adopted for MSC expansion ( $14.3 \times 10^4$   
89 cells/ml in 75cm<sup>2</sup> flasks (Sarstedt), in 14 ml of complete medium. After an average of  $9 \pm 3$  days, cells  
90 were enzymatically detached, centrifuged, washed with ice-cold FACS buffer (2% BSA in PBS 1x),  
91 and then an aliquot containing  $1.5 \times 10^6$  cells was incubated in the dark for 10 min at room temperature  
92 with the following monoclonal mouse anti-human fluorochrome-conjugated antibodies: CD29  
93 Purified (BD Biosciences, Cat No. 556048), CD73-PE (BD Biosciences, Cat No. 550257), CD90-  
94 APC (BD Biosciences, Cat No. 559869), CD105-FITC (Fitzgerald, Acton, MA, Cat No. 61R-CD105-  
95 DHUFT), CD45-APC-Cy7 (BD Biosciences, Cat No. 348805), CD31-PE-Cy7 (Biolegend, San  
96 Diego, CA, Cat No. 303117), CD34 APC-Alexa 700 (Beckman Coulter, Cat No. A86354) Next,  
97 cells were washed and incubated with streptavidin- PE-Texas Red (ECD, Beckman Coulter, Cat No.  
98 IM3326). Labeled cells were resuspended in 200  $\mu$ l of FACS buffer and acquired (30000  
99 events/sample) by a FACSCanto™ Flow Cytometer (BD Biosciences). Data acquisition and analysis

100 were performed using BD FACSDiva™ software. MSCs were identified as CD29+, CD73+, CD90+,  
101 CD105+, CD45-, CD31-, CD34-, as reported in the “Guidelines for Standardization and quality  
102 assessment for clinical grade MSCs from human adipose tissue” formulated by T. Debnath and  
103 coworkers <sup>1</sup>.

## 104 **1.6. Animals and sample size calculation for the rat model**

105 Animals received humane care in compliance with the European Union Directive 2010/63/EU and  
106 the Italian Legislative Decree 26/2014. Experiments were planned according to the Planning  
107 Research and Experimental Procedures on Animals: Recommendations for Excellence (PREPARE)  
108 guidelines <sup>2</sup> and performed in compliance with the 3R principles <sup>3,4</sup>.

109 An “a priori” power analysis was carried out to estimate the minimum number of rats needed to  
110 reliably detect the expected effect size <sup>2-4</sup>. Given the well-known negative effects of reperfusion on  
111 mitochondrial oxidative phosphorylation, ATP liver content was used as reference variable to explore  
112 the effects exerted by the bioreactor-based perfusion. Details on sample size calculation are listed  
113 below:

- 114 • number of groups: 3 (Native, NMP, NMP+bioreactor);
- 115 • statistical test: one-way or two-way repeated measures ANOVA;
- 116 • expected effect size: 0.45;
- 117 • expected standard deviation of residuals: 0.20;
- 118 • desired power: 0.80;
- 119 • alpha error: 0.05.

120 The analysis provided a minimum number of 5 livers for each experimental group. The final number  
121 needed to perform the whole study was therefore 15 rat livers.

## 122 **1.7. Anesthesia, Surgery, In-situ Perfusion, and rat liver procurement**

123 All experiments were performed in sterile conditions. Rats were anesthetized using Isoflurane (Iso-  
124 Vet, Piramal Critical Care, Voorschoten, Netherlands) 3-4% (1-2 L/min O<sub>2</sub> flow) in a rat anesthetic  
125 induction chamber for 10 min. When unresponsive to pain, rats were placed onto the operating table,  
126 ensuring spontaneous breathing with a mask that insufflate 1 L/min O<sub>2</sub> and Isoflurane 3-4%.

127 The surgical procedure began with a xifo-pubic and bilateral subcostal incision. The hepatic pedicle  
128 was then exposed, and the bile duct was dissected. Bile duct was distally ligated with an 8-0 nylon  
129 tie, then a customized cannula (tip: 24 G Neo Delta Ven, Delta Med SpA, Viadana, Italy; tube: PE-  
130 50, BD Intramedic™, Franklin Lakes, NJ, US) was inserted at the end of the choledotomy; the  
131 cannula was secured with a proximal 8-0 nylon tie. Then, the pyloric vein was ligated (8-0 nylon)  
132 and transected, and then the main trunk of the portal vein was dissected distally. The portal vein was



133 encircled with three 5-0 silk tie; then unfractionated heparin (2 IU/g diluted in 1 ml of saline from  
134 Epsoclar, Pfizer Italia S.r.l., Latina, Italy)) was administered by tail intravenous injection. After three  
135 min, portal vein was ligated distally to the splenic vein insertion and a 16 G cannula (Neo Delta Ven,  
136 Delta Med SpA) was inserted by venipuncture until the tip of the cannula reached the portal  
137 bifurcation. A blood retrograde flush was performed, and the in-situ perfusion system was connected.  
138 Then, the cannula was secured with a two-silk tie and gently retracted to avoid obstruction of the  
139 right lobe portal vein branch. Rapid sternotomy was performed, the heart was removed, and the  
140 inferior vena cava was transected. In-situ cold perfusion (4°C) was started with 35 mL of Celsior  
141 solution (IGL, Lissieu, France) at a pressure of 30 cmH<sub>2</sub>O. At the end of in-situ cold perfusion,  
142 hepatectomy was completed and the liver graft was stored in 4°C Celsior (IGL) solution for 30 min.  
143 At the end of cold storage, backtable was completed, while maintaining the liver on a refrigerated  
144 surface.

## 145 **1.8. Rat liver normothermic perfusion**

146 At the end of static cold storage (SCS), the liver was placed onto the modified heated glass reservoir  
147 to let the liver laid on the diaphragmatic surface on a perforated Parafilm. The liver was then  
148 connected to the circuit through the portal vein cannula, while the bile duct cannula was connected  
149 to a 1.5 ml tube in order to collect bile during reperfusion. In the advanced protocol, the MSC-  
150 bioreactor was attached to the circuit before liver connection. The chamber was closed to maintain  
151 humidity. We carefully avoided air embolism during priming and liver connection. The membrane  
152 oxygenator was ventilated with 50% FiO<sub>2</sub> and 5% FiCO<sub>2</sub>, 200 ml/min gas flo.

153 The NMP-protocol was maintained for 280 min and included two phases: 1) the rewarming phase,  
154 lasting 40 min and 2) the normothermic phase, lasting 240 min. During the “rewarming” phase, the  
155 system reaches the temperature of 37°C. Portal flow was set at 5 ml/min and was increased every 5  
156 min up to 30 ml/min, or until the portal pressure reaches 8 mmHg. In the normothermic phase,  
157 temperature was maintained at 37°C and portal flow remained unchanged.

158 Perfusion fluid volume was maintained at 100 ml throughout the procedure. To prevent  
159 MethOxyglobin accumulation, from the beginning of normothermic phase a fixed volume of  
160 perfusate was replaced with fresh perfusion fluid at 20 ml/h flow rate. Waste flow rate was 10 ml/h  
161 from 0 h to 2 h, while it was increased to 14 ml/h from 2 h to 4 h to adjust for the volume of perfusate  
162 collected for biomolecular analysis.

163 Hemodynamics parameters were monitored using the Powerlab 16/35 system (ADInstruments,  
164 Dunedin, New Zeland) and LabChart 8 pro (ADInstruments). Portal vein and pre-membrane  
165 oxygenator pressures were recorded every 5 min during rewarming, and every hour during  
166 normothermic machine perfusion. Vascular resistances were calculated as mean portal vein pressure

167 divided by blood flow of the portal vein (ml/min). Temperature was monitored using a thermo probe  
 168 located between the lobes of the liver. A modified Fick equation was used to calculate oxygen  
 169 delivery ( $\text{DO}_2$ ) and oxygen consumption ( $\dot{\text{V}}\text{O}_2$ ) in our experiments. Cardiac output was intended as  
 170 the pump flow; pre-liver perfusate samples were intended as  $\text{O}_2$  enriched perfusate (arterial blood of  
 171 the Fick equation), whereas post-liver perfusate samples, collected directly from the inferior cava  
 172 vein, were used for the calculation of venous oxygen content.

$$[1,394 \times \text{Hb (g/dL)}_{\text{PRE-LIVER}} \times \text{HbO}_2(\%)] + 0,003 \times \text{P}_{\text{PRE-LIVER}}\text{O}_2(\text{mmHg}) =$$

174 **Oxygen content of the pre-liver perfusate ( $\text{C}_{\text{PREO}_2}$ )**

$$[1,394 \times \text{Hb (g/dL)}_{\text{POST-LIVER}} \times \text{HbO}_2(\%)] + 0,003 \times \text{P}_{\text{POST-LIVER}}\text{O}_2 (\text{mmHg}) =$$

177 **Oxygen content of the post-liver perfusate ( $\text{C}_{\text{POSTO}_2}$ )**

179 Oxygen delivery was measured as follows:

$$\text{DO}_2 = \text{C}_{\text{PREO}_2} \times \text{Pump flow (ml/min)} / 100$$

$$\text{Similarly, } \dot{\text{V}}\text{O}_2 = (\text{C}_{\text{PREO}_2} - \text{C}_{\text{POSTO}_2}) \times \text{Pump flow (ml/min)} / 100$$

### 183 **1.9. Processing of perfusate samples collected during rat liver NMP**

184 Samples were centrifugated at 733 g for 10 min at 4°C (Heraeus Multifuge X3R). Supernatants were  
 185 collected and stored at -80°C for further analysis, whereas cell pellets were washed using 15 ml of  
 186 PBS 1X, vortexed, and then centrifuged for 10 min at 4°C. Afterwards, pellets were resuspended in  
 187 7-15 ml, depending on the volume of perfusate, of erythrocyte lysis buffer (0.155 M  $\text{NH}_4\text{Cl}$ , 10 mM  
 188  $\text{KHCO}_3$ , 0.1 mM  $\text{Na}_2\text{EDTA}$ , pH 7.4) and incubated for 15 min at 4°C. A 10-min centrifugation at  
 189 733 g was then performed (Heraeus Multifuge X3R). Pellets were suspended in 0.5-4 mL of PBS 1X  
 190 for cell count using an automated cell counter (Scepter™, Millipore, Merck KGaA). A qualitative  
 191 assessment of individual donor cell populations was then performed using the Scepter™ 2.0 software  
 192 pro (Merck KGaA) by setting the following gates <sup>5</sup>: 1) debris, 3 - 4  $\mu\text{m}$ ; 2) cell fragments, 4.5 - 6.6  
 193  $\mu\text{m}$ ; 3) lymphocytes, 7.0-8.0  $\mu\text{m}$ ; 4) monocytes/neutrophils/endothelial cells/MSCs, 9 -18  $\mu\text{m}$ .

194 To avoid colorimetric interferences possibly given by Oxyglobin®, perfusates were purified with  
 195 Amicon Ultra 100K centrifugal filter devices (Millipore, Merck KGaA) at 19357 g for 15 min  
 196 (Heraeus Multifuge X3R).

197 **1.10. Comparative analysis of perfusates collected during liverless NMP and rat**  
198 **liver NMP**

199 Perfusates collected during liverless NMP and liver NMP were used to assess the concentration of  
200 the following molecules of human origin: IDO, IL-4, IL-6, IL-8, IL-10, IL-13, IL-1ra, IL-18, IL-33,  
201 IL-36-beta, Galectin-3, Galectin-9, and CCL-2/MCP-1. The release of extracellular vesicles (EVs)  
202 was likewise investigated.

203 *1.10.1. Human IL-4, IL-6, IL-10, IL-13, IL-1ra, IL-36-beta, Galectin-3 and CCL-2/MCP-1*

204 The concentration of Human IL-4, IL-6, IL-10, IL-13, IL-1ra, IL-36-beta, Galectin-3 and CCL-  
205 2/MCP-1 was measured by means Luminex® xMAP Technology (Luminex 200; Luminex, Austin,  
206 TX, USA) with a custom-designed immunoassays (R&D Systems). Briefly, 100 µl from each  
207 antibody-bead vial were added to a Mixing Bottle and then brought to a final volume of 1 ml with the  
208 kit-specific Assay Buffer. Fifty µl of standards, controls and samples were added to the appropriate  
209 wells, then each well was brought to a final volume of 100 µL with 50 µl of mixed beads. The plate  
210 was incubated in the dark for 2 h with gentle agitation at RT. Plate was washed 3 times for every new  
211 step; then Biotin and Streptavidin were added subsequently to the wells. Lastly, 100 µl of Wash  
212 Buffer were added for fluorescence detection.

213 *1.10.2. Human Galectin-9*

214 Concentration of Human Galectin-9 was investigated in perfusate samples before and during NMP  
215 with an ELISA kit. (R&D Systems, Bio-Techne, Minneapolis, USA). Standards were prepared with  
216 a serial dilution ranging from 10 ng/ml to 0.156 ng/ml. Absorbance was read at 450 nm (Synergy  
217 HTX).

218 *1.10.3. Human IL-8, IL-33, and IL-18*

219 Pre-configured Ella® (Bio-Techne) cartridges were used to investigate Human IL-8, IL-33, and IL-  
220 18. Samples were adequately pre-treated and then loaded onto an Ella cartridge. All sample specific  
221 information were entered into the Simple Plex Runner software. The cartridge was inserted into the  
222 device and the run was started. At the end of the assay, the results of triplicate measurements in  
223 relative fluorescence units, mean signal values, SD and coefficient of the variance (CV) were  
224 automatically displayed for each analyte.

225 *1.10.4. Analysis of extracellular vesicles (EVs) released in the perfusate*

226 EVs were isolated from perfusate samples using qEV/35nm size exclusion chromatography columns  
227 (Izon Science, Medford, MA), which preferentially isolates EVs between 35-350nm. Isolated EVs  
228 then underwent size and concentration measurements by nanosight tracking analysis using a  
229 Nanosight NS300 (Malvern Instruments, UK).

## 230 **1.11. Analysis of perfusate samples collected during rat liver NMP**

231 After perfusate processing as reported in the paragraph 1.8.1, samples were used to assess the  
232 following parameters: aspartate aminotransferase (AST), alanine aminotransferase (ALT), Lactate  
233 dehydrogenase, (LDH), NO, rat biomarkers of liver injury, rat biomarkers of endothelial activation,  
234 rat inflammation-related mediators, and rat molecules involved in inflammation resolution and liver  
235 cell regeneration.

### 236 *1.11.1. Succinate*

237 Perfusate succinate was assessed using the Succinate Colorimetric Assay Kit (Sigma-Aldrich).  
238 Perfusates were deproteinized using Amicon Ultra 10K centrifugal filter devices (Millipore, Merck  
239 KGaA). Standards were prepared directly in wells adding from 10 $\mu$ l to 2 $\mu$ l of the 1mM Standard  
240 Solution, therefore with a scale that ranged from 10 nmol/well to 2 nmol/well. After a 30-min  
241 incubation at 37°C, absorbance was read at 450 nm (Synergy HTX).

### 242 *1.11.2. NADH*

243 NADH concentration in perfusates was analyzed through fluorescence intensity, as described  
244 elsewhere<sup>6</sup>. A pre-weighed NADH vial was purchased from Sigma Chemical Company (St. Louis,  
245 MO). A stock solution of 10 mg/ml was prepared using Na-bicarbonate buffer, pH 9. A standard  
246 curve ranging from 250 to 2.5 ng/ml was then prepared using filtered perfusate/medium. Seventy-  
247 five  $\mu$ l of each sample were then added in duplicates to the wells. Fluorescence was determined using  
248 a 340 nm excitation filter and a 440 nm emission filter using a multiplate reader (Synergy HTX).

### 249 *1.11.3. Molecules relevant to tissue damage, inflammation and resolution*

250 Soluble proteins relevant to liver damage, vascular damage and immune activation were evaluated  
251 by means of Luminex® xMAP Technology (Luminex 200) with the following custom-designed  
252 immunoassays (Millipore, Merck KGaA): 1) Rat Liver Injury Magnetic Bead Panel (Arginase-1:  
253 ARG1, 5'-nucleotidase: 5'-NT, Glutathione Transferase Alpha: GST-alpha; Sorbitol dehydrogenase:  
254 SDH); 2) Rat Vascular Injury Magnetic Panels (Adiponectin; Caveolin 1:CAV-1, Connective Tissue  
255 Growth Factor: CTGF, Tissue Plasminogen Activator Inhibitor-1: t-PAI-1, soluble Intercellular  
256 Adhesion Molecule-1: sICAM-1, Soluble endothelial leukocyte adhesion molecule-1: sE-Selectin,  
257 Alpha-1-acid glycoprotein: AGP, Alpha-2-Macroglobulin: A2M, Haptoglobin); 3) Rat  
258 Cytokine/Chemokine Magnetic Bead Panel (Macrophage Inflammatory Protein-1alpha MIP-1alpha;  
259 Interleukin-4: IL-4, Interleukin-6: IL-6, Interleukin-10: IL-10, Interferon-gamma: IFN-gamma,  
260 Interleukin-18: IL-18, Chemokine C-C motif ligand 2/Monocyte Chemoattractant Protein-1:  
261 CCL2/MCP-1, Interferon gamma-induced protein 10: IP-10, C-X-C motif chemokine ligand  
262 1/Cytokine-Induced Neutrophil Chemoattractant-1: CXCL1/CINC-1, Vascular Endothelial Growth

263 Factor: VEGF, C-X-C Motif Chemokine Ligand 5, CXCL5/LIX, Tumor Necrosis Factor-alpha: TNF-  
264 alpha, Chemokine C-C motif ligand 5/regulated on activation, normal T cell expressed and secreted:  
265 CCL5/RANTES).

266 Briefly, 150 µl from each antibody-bead vial were added to a Mixing Bottle and then brought to a  
267 final volume of 3 ml with the kit-specific Assay Buffer. Twenty-five µl of standards, controls and  
268 samples were added to the appropriate wells, then each well was brought to a final volume of 75 µl  
269 with 25 µl of Assay Buffer and 25µl of Mixed Beads. The plate was incubated in the dark for 2 h  
270 with gentle agitation at RT. Plate was washed 3 times, then Detection Antibodies and Streptavidin-  
271 Phycoerythrin were added to the wells. Lastly, 150 µl of Sheath Fluid were added for subsequent  
272 fluorescence detection using a Luminex 200 (Luminex).

#### 273 *1.11.4. Rat Tissue Inhibitor of Metalloproteinase 1 (TIMP-1)*

274 The amount of the Tissue Inhibitor of Metalloproteinase 1 (TIMP-1), was investigated in perfusate  
275 samples using a Rat TIMP-1 Immunoassay (R&D Systems). Standards were prepared with a serial  
276 dilution ranging from 2400 pg/ml to 37.5 pg/ml. Absorbance was read at 450 nm with wavelength  
277 correction at 540 nm (Synergy HTX).

#### 278 *1.11.5. Rat IL-13, Hepatocyte growth factor (HGF)*

279 The amount of IL-13 was investigated in perfusates using an ELISA kit (Abcam, Cambridge, UK).  
280 Standards were prepared with a serial dilution ranging from 5000 pg/ml to 78.125 pg/ml. Absorbance  
281 readings at 450 nm was performed using a multi-mode microplate reader (Synergy HTX).

282 HGF was investigated in perfusates using a Rat HGF Immunoassay (R&D Systems). Standards were  
283 prepared with a serial dilution ranging from 4000 pg/ml to 62.5 pg/ml. Absorbance was read at 450  
284 nm with wavelength correction at 540 nm (Synergy HTX).

## 285 **1.12. Evaluations performed on rat liver biopsies**

### 286 *1.12.1. Wet-to-Dry Ratio*

287 Biopsies were weighted on an analytical balance (Sartorius AG, Göttingen, Germany) before and  
288 after desiccation in an oven at 50 °C for 48 h. Thereafter, wet/dry ratios (W/D) were calculated as an  
289 index of edema.

### 290 *1.12.2. ATP content assessment*

291 Snap frozen liver samples were homogenized in trichloroacetic acid (Sigma-Aldrich ) at a  
292 concentration of 50 mg/ml. Liver homogenates were subjected to centrifugation at 20817 g for 15  
293 min at 4°C (Heraeus Multifuge X3R) and then supernatants were collected and diluted 1:30 using 0.1  
294 M Tris-acetate, pH 7.75 (Millipore, Merck KGaA). Next, 10 µl of each sample were dispensed in a

295 blank 96-well plate and 90  $\mu$ L of luciferase (Enliten ATP Assay System, Promega, Madison, WI,  
296 USA) were automatically added during the analysis in the Luminometer (Glomax Luminometer,  
297 Promega). Bioluminescent signals were immediately detected. ATP concentration was calculated by  
298 means of a standard curve that ranged from  $10^{-4}$  M to  $10^{-10}$  M (rATP 10 mM, Promega).

#### 299 *1.12.3. Determination of ATP derivatives by High-performance liquid chromatography*

300 Snap frozen tissue biopsies (40-50 mg) were homogenized in 2.5% trichloroacetic acid (Sigma-  
301 Aldrich ) at a concentration of 50 mg/ml. Liver homogenates were subjected to centrifugation at  
302 20817 g for 15 min at 4°C (Heraeus Multifuge X3R) and then supernatants were analyzed in  
303 duplicates by High-performance liquid chromatography (HPLC) with a mass spectrometer as detector  
304 (UltiMate 3000, Thermo Fisher Scientific) using a reversed phase C18 HPLC column (Zorbax RRHD  
305 SB-C18, 5micron, 4.6x250 mm, Agilent, Santa Clara, CA, US), with a mobile phase containing 0.1%  
306 formic acid in water (fase A) and CH<sub>3</sub>CN (fase B). The signal was detected by UV absorbance at 254  
307 nm. Energy charge defined as:  $(ATP + 0.5 \times ADP) / (ATP + ADP + AMP)$  was calculated as  
308 previously described <sup>7</sup>.

#### 309 *1.12.4. Tissue NAD<sup>+</sup>/NADH content measurement*

310 NAD<sup>+</sup>/NADH content was assessed using a Colorimetric Assay Kit (Sigma-Aldrich). Snap frozen  
311 liver samples were homogenized at a concentration of 50 mg/ml. Standards ranged from 10 nmol/well  
312 to 2 nmol/well. Absorbance was read at 450 nm (Synergy HTX).

### 313 **1.13. Porcine model of Donation after cardiocirculatory death (DCD) and liver** 314 **NMP**

#### 315 *1.13.1. Sample size*

316 This pilot study was designed to establish a novel perfusion system by combining the Liver Assist®  
317 machine to a stem cell bioreactor. Sample size was determined according to the guidance published  
318 by NC3R <sup>8</sup>, considering the following possible outcomes: 1) success of execution (feasible) or 2)  
319 failure of execution (unfeasible). Based on our experience in the set up and implementation of  
320 unprecedent perfusion platforms for preclinical models <sup>9-11</sup>, we deemed necessary using 3 animals  
321 for the NMP+bioreactor group. Therefore, work package 3 included a total of 6 animals.

#### 322 *1.13.2. Preparation of the bioreactor suitable for porcine livers*

323 Human plasmafilters (Aferetica Srl) were used as bioreactors for the pig experiments (Supplementary  
324 Figure 10). Briefly, these devices have a 2000 cm<sup>2</sup> surface area and, similar to the bioreactors used  
325 in the small animal study, the fibers are constituted from 150 nm pores-membranes. As established  
326 in the first two work packages of the research, bioreactors were prepared in the Padua Lab. A total of

327  $3.7 \times 10^7$  stem cells were injected into the extracapillary space of the bioreactor at a seeding density  
328 of  $1.85 \times 10^4$  cells/cm<sup>2</sup>. When adjusted for the perfusate volume and flow rate into the bioreactor, the  
329 cell concentration resulted similar between the rodent and porcine models.

330 After 12 h-incubation at standard conditions, supernatants were replaced with complete medium and  
331 bioreactors were shipped at room temperature to the Department of Veterinary Medical Sciences  
332 (Ozzano, Italy).

#### 333 *1.13.3. Anesthesia, surgery, liver procurement*

334 After an initial sedation with an intramuscular injection of 5 mg/kg Tiletamine-Zolazepam (Zoletil®,  
335 Virbac, France), anesthesia was induced using 6-8% Sevoflurane (SevoFlo, Zoetis, Belgium) in 1:1  
336 oxygen/air via face mask, then maintained with the same halogenated agent (2-3 %) upon orotracheal  
337 intubation. Animals were ventilated and monitored using a fully equipped anesthesia delivery unit  
338 (Datex Ohmeda ADU S5, GE healthcare, Chicago, IL, USA). After heparin intravenous  
339 administration at a dosing of 300 UI/Kg (Eparina Vister, Teva Italia srl, Italy), the left jugular vein  
340 was cannulated (High flow double lumen ST 13 Fr, Joline, Hechingen, Germany) to allow the  
341 collection of 2000 ml of autologous blood.

342 At 60 min from death declaration, livers were cold flushed using 2000 ml of Ringer 's solution  
343 (S.A.L.F. spa, Italy) for 20 min. At the end of in-situ cold perfusion, hepatectomy was completed and  
344 the bile duct, the portal vein (PV), and the hepatic artery (HA) were isolated and cannulated. The  
345 whole back table procedure lasted 10 min for a total of 30 min cold ischemia time.

#### 346 *1.13.4. Protocol for porcine liver NMP*

347 Livers were connected to an oxygenated dual vessel perfusion device (Liver Assist®, XVIVO  
348 Perfusion AB, Sweden), with the following target settings: PV pressure 8-10 mmHg; HA pressure  
349 60-70 mmHg; temperature at steady state 37°C.

350 The perfusion fluid consisted in 1000 ml of leukocyte-depleted autologous blood, supplemented with  
351 (Infuplas freeflex Fresenius), antibiotics (Fluconazole, Kabipac; Cefazolin, Qilu Pharma), parenteral  
352 nutrition (Olimel N4, Baxter), Multivitaminics (Cernevit, Baxter), Heparin, Calcium gluconate  
353 (Monico spa, Venezia Mestre, Italy), Sodium chlorate (Monico), Sodium bicarbonate (Monico), and  
354 Fast acting Insulin (Humulin-R Lilly). The perfusate final volume was 2000 ml; no fluid replacement  
355 was performed over the NMP procedure.

356 According to our clinical protocol, livers were connected to the device through the HA and PV  
357 cannulae at 21°C. During the rewarming phase, fluid temperature and flows were gradually increased  
358 to reach the pre-set target values over 15 min. The normothermic phase was maintained for 4 h.  
359 Following the manufacturer's instructions, the HA was perfused with a 60 bpm pulse generated by a  
360 centrifugal pump. Perfusate oxygenation and/or gas exchange occurred via 2 separate oxygenators.

361 Hemodynamics parameters and temperature were continuously monitored over the procedure. Gas  
362 analysis and biochemical tests of the perfusion fluid were performed at pre-defined time intervals.



## **2. Supplementary results**

### **2.1. Preliminary characterization of MSCs isolated from adipose tissue**

Flow cytometry analysis were performed to characterize the immunophenotype of MSCs isolated from adipose tissue and then cultured in vitro (from P1 to P8).

The analysis revealed a consistent expression of MSC-specific markers as CD90, CD73, CD105 and CD29 on the membrane of the majority of MSCs (91-99%) independently on the in vitro subculturing passage and on the cell cycle staging. On the contrary MSCs were negative for hematological lineage-specific marker (CD45) and endothelial lineage-specific marker (CD31) and downregulated by in vitro culturing the expression of CD34 progressively starting from P2.

### **2.2. Transmembrane pressure during liverless NMP**

Filter pressure drop ( $\Delta P$  filter) remained low during the perfusion and transmembrane pressure (TMP) was stable, suggesting no clotting or clogging issues over 4 h (Supplementary Figure 1).

### **2.3. Gas analysis during liverless NMP**

Although pH values increased over the liverless procedure, they remained slightly under the physiological range (Supplementary Figure 2). A rise of K<sup>+</sup> and Cl<sup>-</sup> concentration was likewise revealed. Finally, Na<sup>+</sup> and Ca<sup>++</sup> did not change during the liverless NMP.

### **2.4. EVs suspended in the perfusates during rat liver NMP**

The EVs suspended in the perfusates of the NMP+bioreactor group ranged from 123.80 nm to 209.2 nm, while a different particle size was revealed in the perfusate samples collected during standard NMP (Supplementary Figure 4).

### **2.5. Release of Human CK18 during liverless and rat liver NMP**

We investigated whether MSCs underwent cell death during rewarming, by assessing the release of human CCK18 into the perfusate. The data showed that the degree of apoptosis activation during liver-NMP was similar to that observed during liverless-NMP, indicating that the cells did not experience excessive distress during the different phases of the liver-NMP procedure (Supplementary Figure 5).

### **2.6. Hemodynamics during rat liver NMP**

Hemodynamics monitoring indicated that portal pressures and vascular resistances increased over the NMP procedure ( $p < 0.001$ ), but remained below 8 mmHg without adjustments of flow rate.

No differences in both portal pressures and vascular resistances were detected across experimental groups ( $p = 0.713$  and  $p = 0.624$ , respectively; Supplementary Figure 5).

## **2.7. Gas analysis of perfusate samples collected during rat liver NMP**

A trend towards perfusate pH stabilization was observed in the bioreactor-based perfusion starting from 2 h post-reperfusion, while a progressive pH decrease was observed in the NMP group (NMP+bioreactor: from  $6.941 \pm 0.02$  to  $7.048 \pm 0.017$ ; NMP: from  $6.973 \pm 0.021$  to  $6.992 \pm 0.021$ ,  $p=0.045$  at 4 h).

Lactate uptake was calculated with the following formula:  $(C_{\text{start}} - C_{\text{end}}) / C_{\text{end}}$  where C stands for concentration. Total lactate uptake was similar between groups (NMP+bioreactor:  $1.36 \pm 0.25$  vs  $1.2 \pm 0.30$ ,  $p=0.837$ )

The results of electrolyte assessment are shown in Supplementary Figure 4. A higher amount of  $K^+$  was revealed in the standard NMP procedure compared to NMP+bioreactor procedure. On the other hand, the concentration of  $Ca^{++}$  and  $Cl^-$  was higher in the NMP+bioreactor group, even if the concentration of both electrolytes slightly varies throughout reperfusion.  $Na^+$  concentration is similar between groups.

## **2.8. Analysis of the bile produced during rat liver NMP**

The following bile parameters were similar between the NMP+bioreactor and the NMP group:  $\Delta pH$  (NMP+bioreactor vs NMP:  $0.028 \pm 0.040$  vs  $0.082 \pm 0.020$ ;  $p=0.340$ ),  $\Delta HCO_3^-$  ( $3.30 \pm 1.71$  mmol/L vs  $4.0 \pm 0.64$  mmol/L;  $p=0.730$ ), and  $\Delta$ glucose ( $49.8 \pm 13.99$  mg/dl vs  $26.4 \pm 20.17$  mg/dl;  $p=0.350$ ).

## **2.9. NAD<sup>+</sup>/NADH evaluation**

The NMP+bioreactor group registered a higher amount of both NAD total and NADH content in tissue homogenates with respect to both native livers and to the NMP group (Supplementary Figure 5). In general, perfusion procedures lead to a higher concentration of NAD<sup>+</sup>/NADH (One way ANOVA, Tukey's post hoc test. p-value vs the Native group:  $*** < 0.001$ ; p value vs the NMP group:  $\# < 0.05$ ;  $### < 0.001$ ).

The NADH content released in perfusate by livers subjected to the bioreactor-based perfusion was higher compared to that of the NMP group and remained stable throughout reperfusion (Two-way RM ANOVA, Tukey's post hoc test. p-value vs the NMP group:  $*** < 0.001$ ).

## **2.10. Characterization of the MSCs harvested from the bioreactors after liver NMP**

MSCs recovered from the bioreactors at the end of the perfusion experiments displayed similar viability and morphology compared with the original cells. Flow cytometry showed similar MSCs' immunophenotype before and after NMP experiments.

### 3. Supplementary Tables

**Supplementary Table 1. Experimental design adopted to perform rat liver NMP**

| Experimental group<br>(n=5) | Procedure  |                   |                   |             |              |
|-----------------------------|------------|-------------------|-------------------|-------------|--------------|
|                             | Anesthesia | Liver procurement | In situ perfusion | SCS (30min) | NMP (240min) |
| Native                      | √          | √                 |                   |             |              |
| SCS                         | √          | √                 | √                 | √           |              |
| NMP                         | √          | √                 | √                 | √           | √            |
| NMP+bioreactor              | √          | √                 | √                 | √           | √            |

## Supplementary Table 2. Gas analysis of MSC-bioreactor supernatants

Samples were collected immediately after MSC-bioreactor delivery to the the Center for Preclinical Research, Fondazione IRCCS Ca' Granda Ospedale Maggiore Policlinico, Milan, Italy (Milan lab). Ten bioreactors were analyzed; Data are presented as mean±SEM.

---

| <b>Parameter</b>       | <b>Reference value</b> | <b>MSC-bioreactor supernatants (n=10)</b> |
|------------------------|------------------------|-------------------------------------------|
| <b>pH</b>              | 7.49                   | 7.03±0.09                                 |
| <b>K+, mmol/L</b>      | 4.8                    | 4.05±0.3                                  |
| <b>Na+, mmol/L</b>     | 135                    | 137.54±10.51                              |
| <b>Ca++, mmol/L</b>    | 0.99                   | 0.93±0.01                                 |
| <b>Cl-, mmol/L</b>     | 121                    | 125.54±1.23                               |
| <b>Lactate, mmol/L</b> | 0.7                    | 6.65±0.36                                 |
| <b>Glucose, mg/dl</b>  | 101                    | 25.72±3.25                                |

---

**Supplementary Table 3. Timings of sample collection during rat liver NMP**

| Sample               | Evaluation             | Wash-out | Rewarming phase | Normothermic phase |     |     |     |
|----------------------|------------------------|----------|-----------------|--------------------|-----|-----|-----|
|                      |                        | 5 min    | 40 min          | 1 h                | 2 h | 3 h | 4 h |
| <b>Perfusate</b>     |                        |          |                 |                    |     |     |     |
| 0.5 ml pre-liver     | Gas analysis           |          | √               | √                  | √   | √   | √   |
| 0.5 ml post-liver    | Gas analysis           | √        | √               | √                  | √   | √   | √   |
| 4 ml pre-liver       | Bio-molecular analysis | √        | √               | √                  | √   | √   | √   |
| 4 ml post-liver      | Bio-molecular analysis | √        | √               | √                  | √   | √   | √   |
| 3 ml post-liver      | Biochemical tests      | √        | √               | √                  |     |     | √   |
| <b>Bile</b>          | Gas analysis           |          | √               | √                  | √   | √   | √   |
| <b>Tissue biopsy</b> | Bio-molecular analysis |          |                 |                    |     |     | √   |

**Supplementary Table 4. Biochemical analysis of perfusate samples collected throughout porcine liver NMP**

| Variable                        | Group          | Time        |             |             | p-value |
|---------------------------------|----------------|-------------|-------------|-------------|---------|
|                                 |                | 1 h         | 2 h         | 4 h         |         |
| <b>Urea, mg/dL</b>              |                |             |             |             | 0.657   |
|                                 | NMP            | 14.33±2.72  | 56.66±2.02  | 36.4±2.15   |         |
|                                 | NMP+bioreactor | 41.66±1.45  | 13.2±1.77   | 59.4±5.01   |         |
| <b>Creatinine, mg/dL</b>        |                |             |             |             | 0.099   |
|                                 | NMP            | 1.26±0.25   | 1.2±0.15    | 1.13±0.04   |         |
|                                 | NMP+bioreactor | 1.32±0.2    | 1.08±0.04   | 1.08±0.04   |         |
| <b>AST, IU/L</b>                |                |             |             |             | 0.102   |
|                                 | NMP            | 2043±474    | 3038±1472   | 1463±184    |         |
|                                 | NMP+bioreactor | 2670±1304   | 757±139     | 1690±236    |         |
| <b>ALT, IU/L</b>                |                |             |             |             | 0.304   |
|                                 | NMP            | 80±37.63    | 53.33±19.41 | 66.4±11.13  |         |
|                                 | NMP+bioreactor | 94±45.82    | 51.4±5.87   | 56.8±8.81   |         |
| <b>Total Bilirubin, mg/dL</b>   |                |             |             |             | 0.039   |
|                                 | NMP            | 0.1±0.02    | 0.18±0.05   | 0.08±0.02   |         |
|                                 | NMP+bioreactor | 0.17±0.07   | 0.06±0.01   | 0.1±0.03    |         |
| <b>GGT, IU/L</b>                |                |             |             |             | 0.311   |
|                                 | NMP            | 10.93±3.12  | 12.76±3.64  | 11.4±1.61   |         |
|                                 | NMP+bioreactor | 15.56±1.98  | 11.4±0.95   | 11.3±1.49   |         |
| <b>Total Cholesterol, mg/dL</b> |                |             |             |             | 0.199   |
|                                 | NMP            | 15.33±4.66  | 14.33±5.23  | 10±3.34     |         |
|                                 | NMP+bioreactor | 15±6.42     | 8.8±3.63    | 11.6±3.58   |         |
| <b>Uric acid, mg/dL</b>         |                |             |             |             | 0.062   |
|                                 | NMP            | 0.34±0.2    | 0.19±0.09   | 0.08±0.04   |         |
|                                 | NMP+bioreactor | 0.43±0.25   | 0.34±0.03   | 0.01±0      |         |
| <b>Glucose, mg/dl</b>           |                |             |             |             | 0.885   |
|                                 | NMP            | 361.3±119.0 | 588.6±244.2 | 352.3±123.2 |         |
|                                 | NMP+bioreactor | 496.4±45.7  | 477.6±129.3 | 283.4±88.2  |         |

Three cases were analyzed for each experimental group; Data are presented as mean±SEM. Two-way ANOVA. Abbreviations: ALT, alanine amino transferase; AST, aspartate amino transferase; GGT, gamma glutamyl transferase

**Supplementary Table 5. Gas analysis of the perfusate during porcine liver NMP**

| Variable         | Group          | Time        |             |             | p-value      |
|------------------|----------------|-------------|-------------|-------------|--------------|
|                  |                | 1 h         | 2 h         | 4 h         |              |
| <b>Ca, mg/dL</b> |                |             |             |             | <i>0.084</i> |
|                  | NMP            | 4.2±1.35    | 4.23±0.71   | 4.03±0.56   |              |
|                  | NMP+bioreactor | 4.7±1.05    | 6.58±1.3    | 6.78±1.29   |              |
| <b>P, mg/dL</b>  |                |             |             |             | <b>0.037</b> |
|                  | NMP            | 7.53±0.61   | 10.29±0.78  | 8.81±1.51   |              |
|                  | NMP+bioreactor | 6.15±0.05   | 8.63±0.47   | 7.81±0.76   |              |
| <b>Na, mEq/L</b> |                |             |             |             | 0.414        |
|                  | NMP            | 159.33±7.26 | 158.66±3.92 | 161.66±1.85 |              |
|                  | NMP+bioreactor | 159.4±1.02  | 155.8±1.31  | 158.6±1.86  |              |
| <b>K, mEq/L</b>  |                |             |             |             | 0.209        |
|                  | NMP            | 4.83±1.01   | 2.8±0.09    | 2.03±0.43   |              |
|                  | NMP+bioreactor | 4.56±0.5    | 4.24±0.34   | 2.76±0.32   |              |
| <b>Cl, mEq/L</b> |                |             |             |             | <b>0.008</b> |
|                  | NMP            | 103.03±5.19 | 101.43±2.27 | 103.93±3.65 |              |
|                  | NMP+bioreactor | 96.5±0.94   | 96.9±1.06   | 98.52±1.23  |              |
| <b>Mg, mg/dL</b> |                |             |             |             | 0.187        |
|                  | NMP            | 2.29±0.3    | 1.84±0.59   | 1.37±0.58   |              |
|                  | NMP+bioreactor | 2.39±0.02   | 2.24±0.1    | 1.82±0.16   |              |

Three cases were analyzed for each experimental group; Data are presented as mean±SEM. Two-way RM ANOVA.



**Supplementary Table 6. Histological evaluation of tissue biopsies collected before and after porcine liver NMP**

| Group                 | Time          | Parameter  |          |             |                       | Total score |
|-----------------------|---------------|------------|----------|-------------|-----------------------|-------------|
|                       |               | Hemorrhage | Necrosis | Cholestasis | Sinusoidal dilatation |             |
| <b>NMP</b>            |               |            |          |             |                       |             |
|                       | <b>before</b> | 0±0        | 0±0      | 0±0         | 1±0                   | 1±0         |
|                       | <b>after</b>  | 0±0        | 0±0      | 0±0         | 1±0                   | 2±1         |
| <b>NMP+bioreactor</b> |               |            |          |             |                       |             |
|                       | <b>before</b> | 0±0        | 0±0      | 0±0         | 1±0                   | 2±0         |
|                       | <b>after</b>  | 1±0        | 0±0      | 0±0         | 1±0                   | 3±1         |

## 4. Supplementary Figures

### Supplementary Figure 1. MSC-bioreactors utilized to develop the advanced NMP platform for small animal models

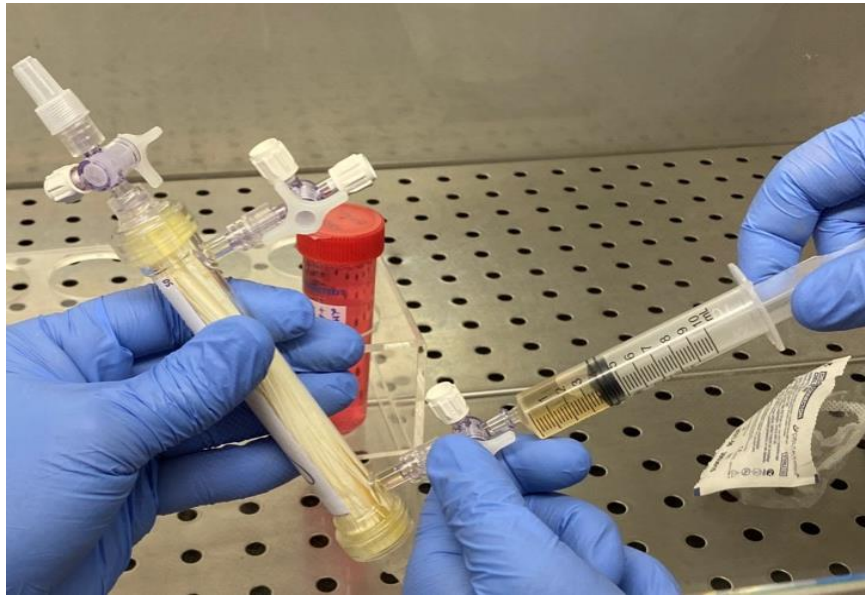

The hollow fiber bioreactors (Aferetica srl, Bologna, Italy) show a cylindrical structure with 2 stopcocks per side. There are two compartments: 1) the intracapillary space; 2) the extracapillary space. The fibers provide a total of 500 cm<sup>2</sup>-culturing surface and are constituted from 150 nm pores-membranes. The pore size allows a selective exchange of molecules and factors between the two compartments.

## Supplementary Figure 2. Transmembrane pressure during liverless NMP

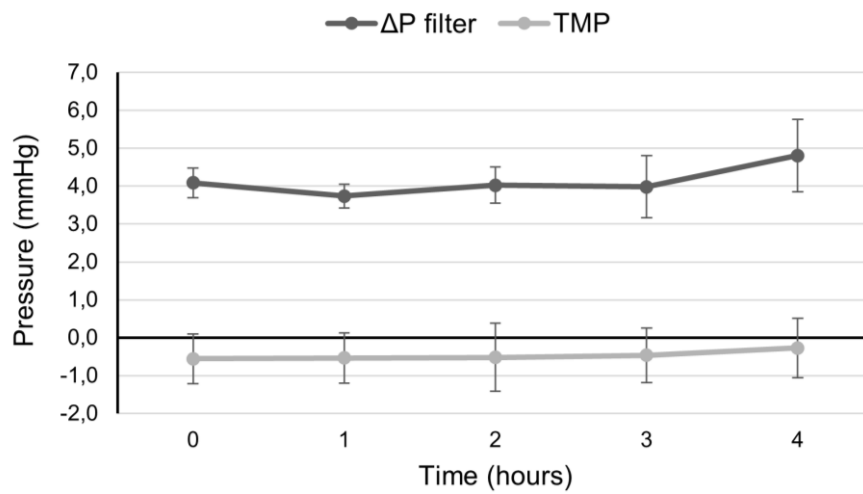

Filter pressure drop ( $\Delta P$  filter) and Transmembrane Pressure (TMP) were monitored during 4h perfusion to assess pressure parameters stability. Filter pressure drop ( $\Delta P$  filter) stayed low and Transmembrane Pressure (TMP) remained stable throughout perfusion. Points denote mean $\pm$ SEM, n=5 independent liverless procedures.

### Supplementary Figure 3. Gas analysis during liverless NMP

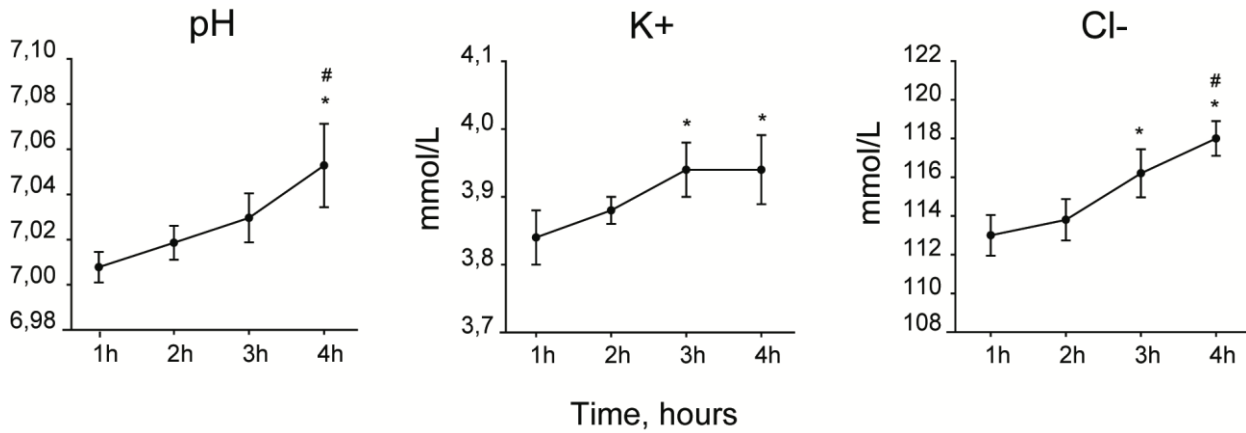

Perfusates gas-analysis during liverless-NMP showed a rise in pH levels, as well as an increased release of K<sup>+</sup> and Cl<sup>-</sup>. Points denote mean±SEM, n=5 independent liverless procedures. One-way RM ANOVA.p-value for time: pH p=0.002; K<sup>+</sup> p=0.010; Cl<sup>-</sup> p=0.001. Asterisks denote: p -value vs 1 h \*<0.05; p -value vs vs 2 h #<0.05.

## Supplementary Figure 4. Extracellular vesicles released during rat liver-NMP

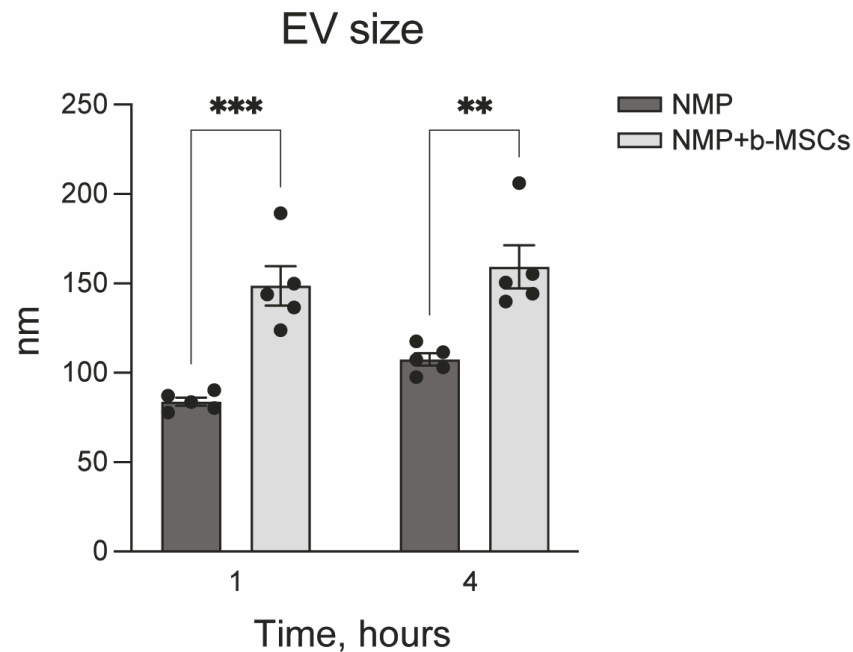

The extracellular vesicles released during the NMP+bioreactor procedure showed a greater size relative to those detected in the perfusates of standard NMP. Bars denote mean $\pm$ SEM, n=5 independent biological replicates. Two-way ANOVA, Tukey's post hoc test. P-value for group comparison:  $p < 0.0001$ . Asterisks denote p-value vs NMP: \*\*\* $p = 0.003$ ; \*\* $p = 0.002$ . Abbreviations: b-MSCs, MSC-bioreactor; EVs, extracellular vesicles; NMP, normothermic machine perfusion.

**Supplementary Figure 5. Release of Human CK18 during liverless- and rat liver-NMP**

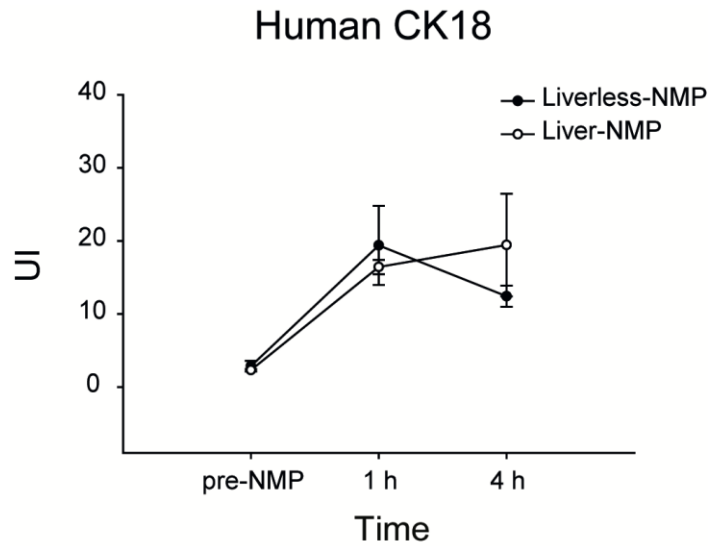

The release of human CK18 was measured as an index of MSCs apoptosis. Pre-NMP samples were collected immediately before MSC-bioreactor connection to the perfusion circuit. No significant differences were detected between experimental groups. Points denote mean $\pm$ SEM, n=5 independent biological replicates. Two-way RM ANOVA, p=0.613. Abbreviations: CK18, cytokeratin 18; NMP, normothermic machine perfusion.

## Supplementary Figure 6. Hemodynamics parameters during rat liver NMP

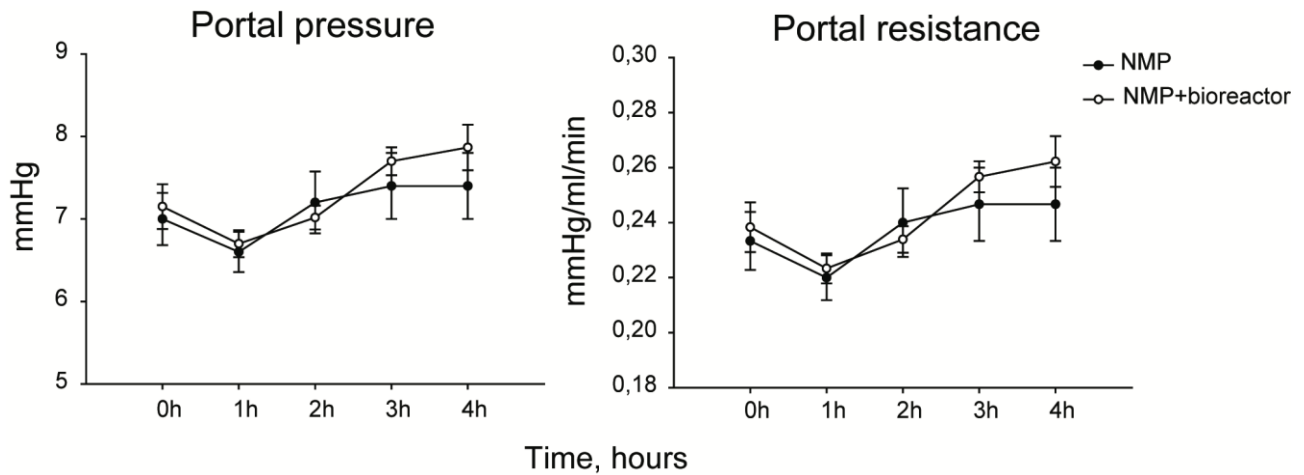

Hemodynamics parameters were monitored throughout liver-NMP. Portal pressures and vascular resistances increased over the procedure, remaining below 8 mmHg.

No statistically significant differences were detected between experimental groups. Bars denote mean $\pm$ SEM, n=5 independent biological replicates. Two-way RM ANOVA, portal pressure:  $p=0.713$ ; portal resistance:  $p=0.624$ . Abbreviations: NMP, normothermic machine perfusion.

## Supplementary Figure 7. Gas analysis of perfusate samples collected during rat liver NMP

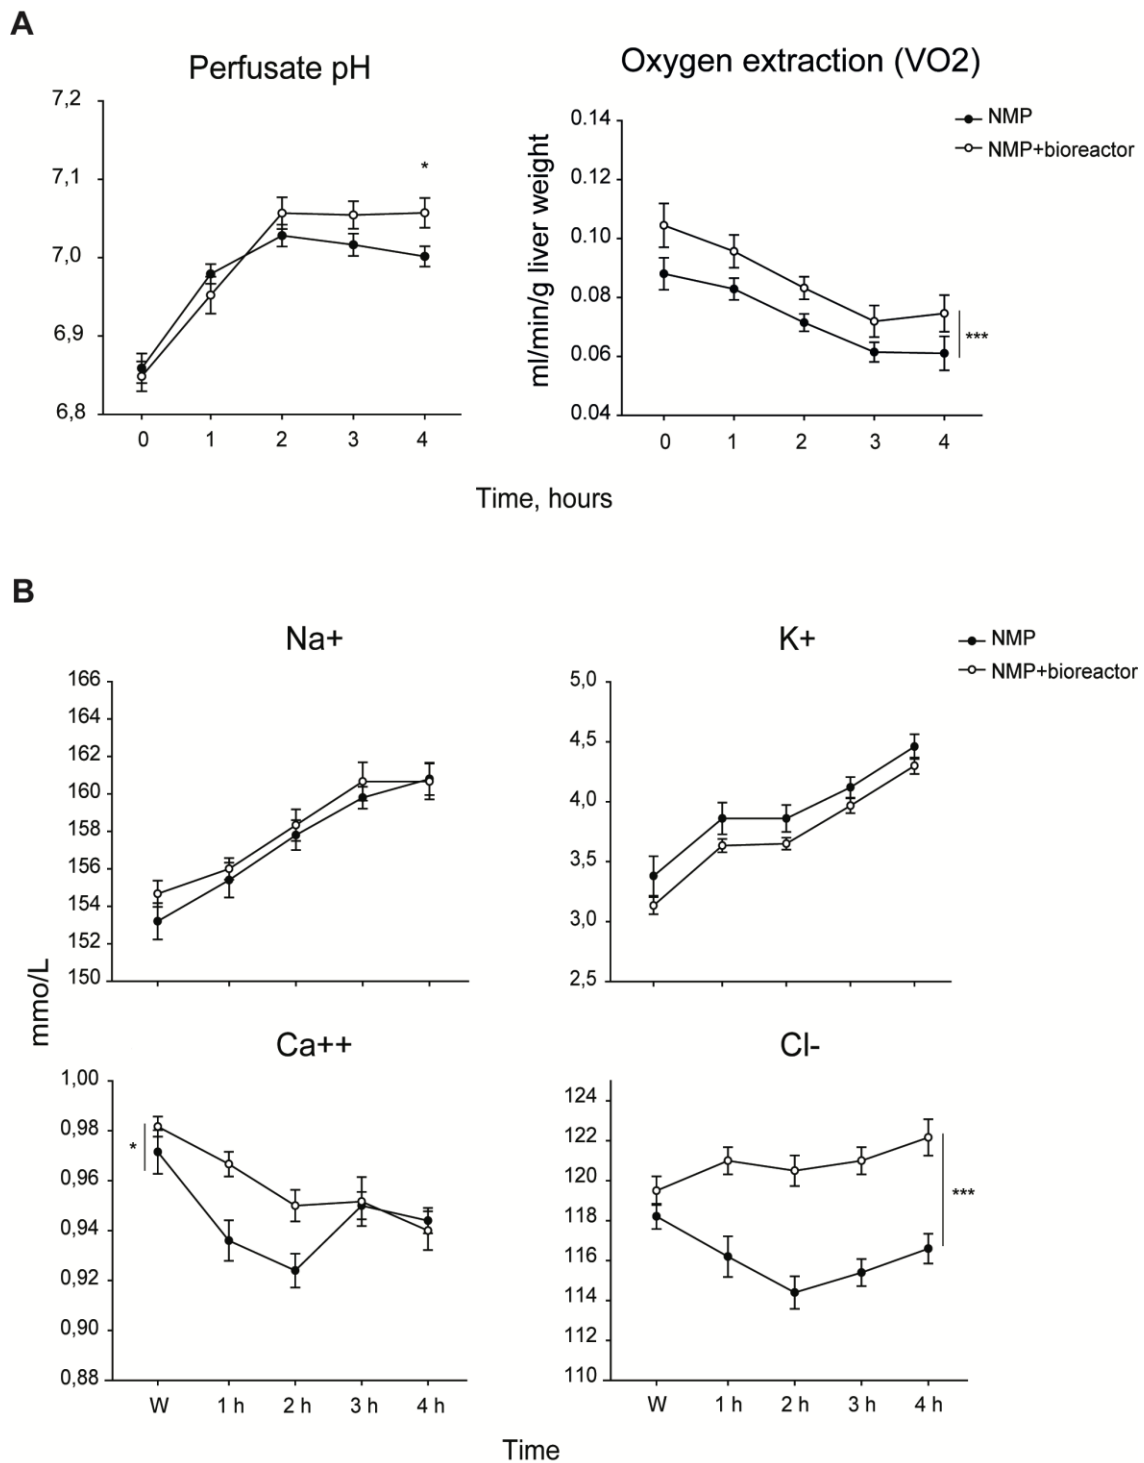

A) Perfusate pH was stable in the NMP+bioreactor group starting from 2 h post-reperfusion, while a progressive pH decrease was observed in the NMP group. Points denote mean±SEM, n=5 independent biological replicates. Two-way RM ANOVA, p-value vs NMP at 4 h: p=0.045. Oxygen extraction (VO<sub>2</sub>) was consistently higher in the NMP+bioreactor group compared to NMP alone.



Points denote mean±SEM, n=5 independent biological replicates. Two-way RM ANOVA, p-value vs NMP: \*\*\*p<0.001.

B) Perfusate electrolytes during liver-NMP.. Points denote mean±SEM, n=5 independent biological replicates. Two-way RM ANOVA, p-value for group comparison: K<sup>+</sup> p=0.059; Ca<sup>++</sup> p=0.027; Cl<sup>-</sup> p<0.001; Na<sup>+</sup> p=0.438. Asterisks denote \*p<0.05; \*\*\*p<0.001. Abbreviations: NMP, normothermic machine perfusion; W, wash-out.

## Supplementary Figure 8. NAD<sup>+</sup> and NADH content in rat liver homogenates and perfusate samples

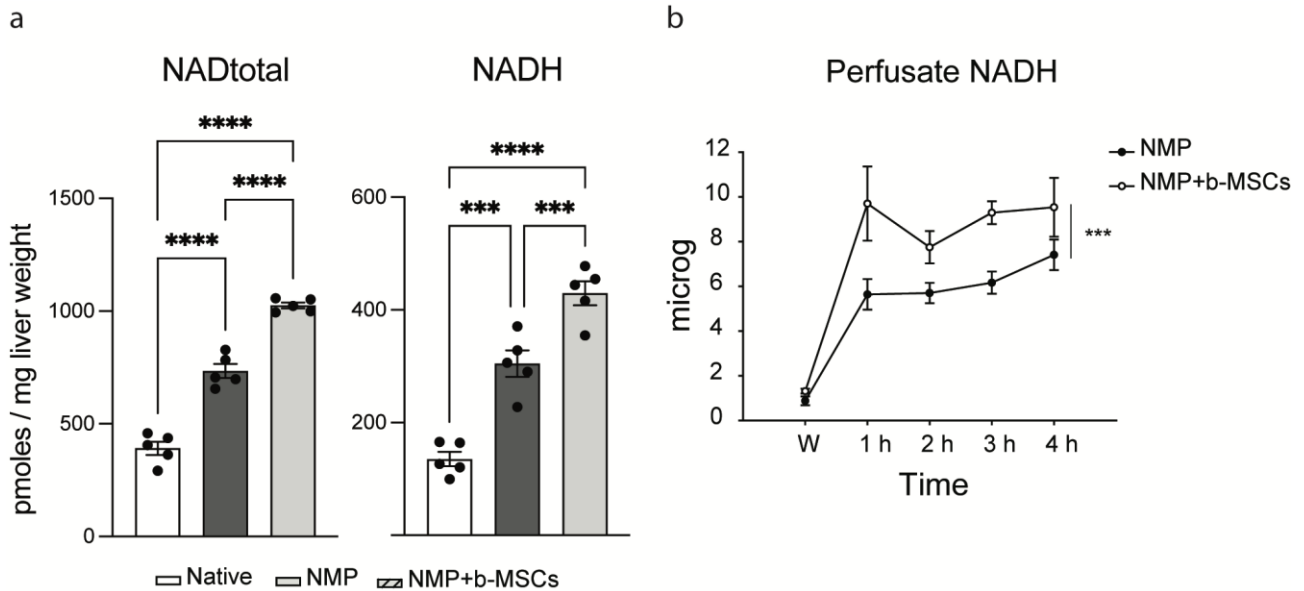

**a** Tissue NAD and NADH were evaluated in liver biopsies. The NMP+bioreactor group showed a greater amount of both total NAD and NADH content compared with the Native group ( $p < 0.0001$  and  $p < 0.0001$ ) and the standard NMP ( $p < 0.0001$  and  $p = 0.0007$ ). Bars denote mean  $\pm$  SEM,  $n = 5$  independent biological replicates. One way ANOVA, Tukey's post hoc test.  $p$ -value for group comparison: NAD total  $p < 0.0001$ ; NADH  $p < 0.0001$ . Asterisks denote: \*\*\* $p < 0.001$ ; \*\*\*\*  $p < 0.0001$ .

**b** NADH content was measured in perfusate samples throughout the NMP procedure. The NMP+bioreactor group showed higher NADH concentrations compared to the NMP group. Points denote mean  $\pm$  SEM,  $n = 5$  independent biological replicates. Two-way RM ANOVA, Tukey's post hoc test.  $p$ -value vs NMP: \*\*\* $p = 0.001$ . Abbreviations: b-MSCs, MSC-bioreactor; NAD, nicotinamide adenine dinucleotide; NMP, normothermic machine perfusion; W, wash-out.

**Supplementary Figure 9. Plasmafilters used to implement the advanced NMP platform for large animals**

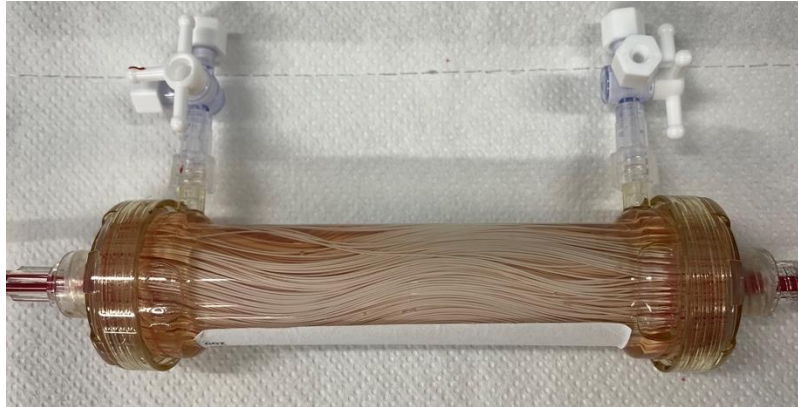

Human plasmafilters (Aferetica Srl) show a 2000 cm<sup>2</sup> surface area. Similar to the bioreactors used in the small animal study, the fibers are constituted from 150 nm pores-membranes.

**Supplementary Figure 10. Connection of the human plasmafilter to the Liver Assist® perfusion platform.**

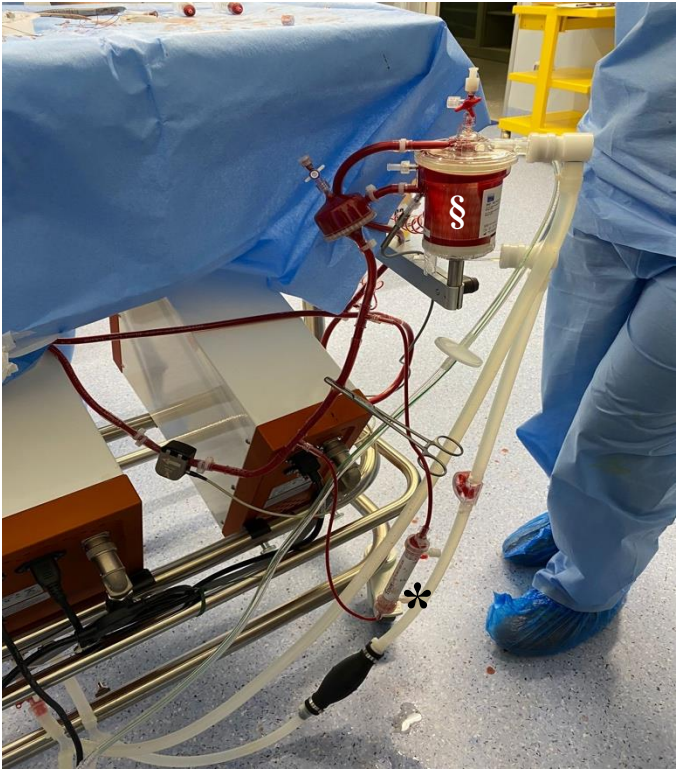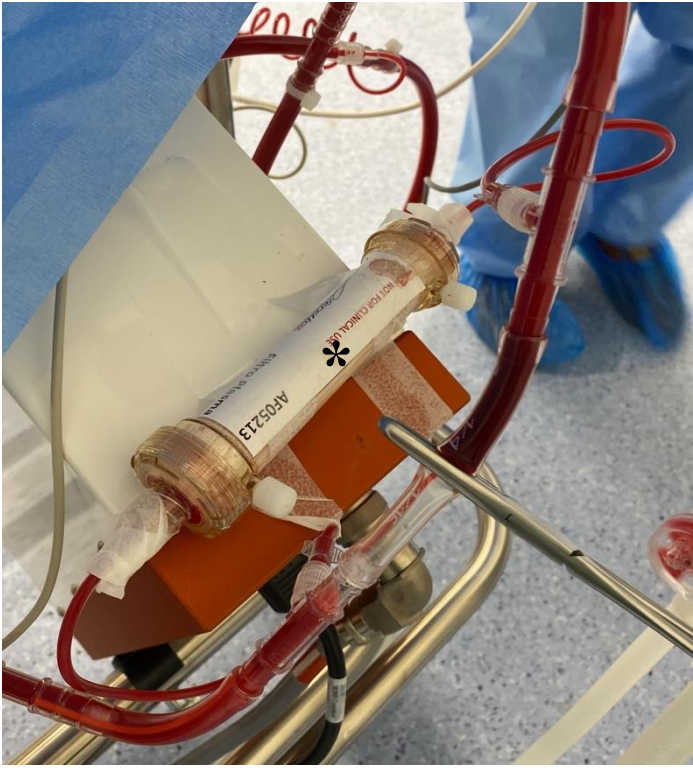

§ membrane lung oxygenator; \* bioreactor connected to the main arterial circuit through a dedicated loop.

### Supplementary Figure 11. Perfusate pH during porcine liver NMP

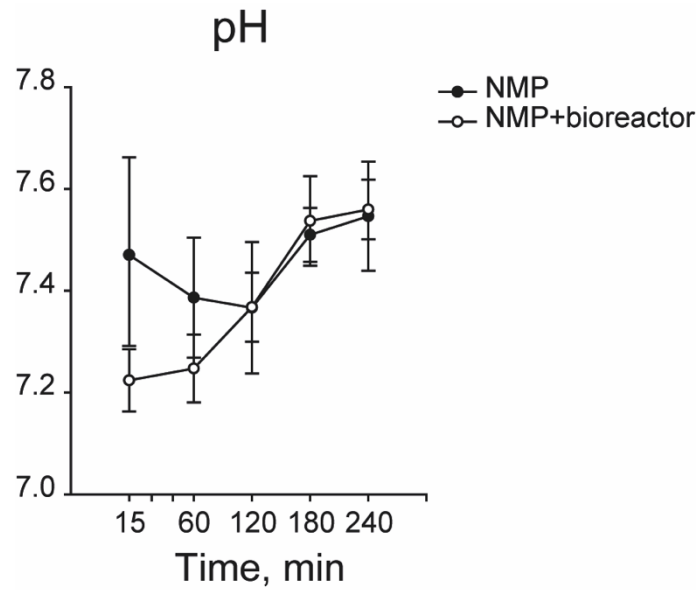

Points denote mean $\pm$ SEM, n=3 independent biological replicates. Two-way RM ANOVA, Tukey's post hoc test. p-value for group comparison: p=0.233. Abbreviations: NMP, normothermic machine perfusion.

**Supplementary Figure 12. Histological pictures of tissue biopsies collected before and after porcine liver NMP performed with the advanced platform**

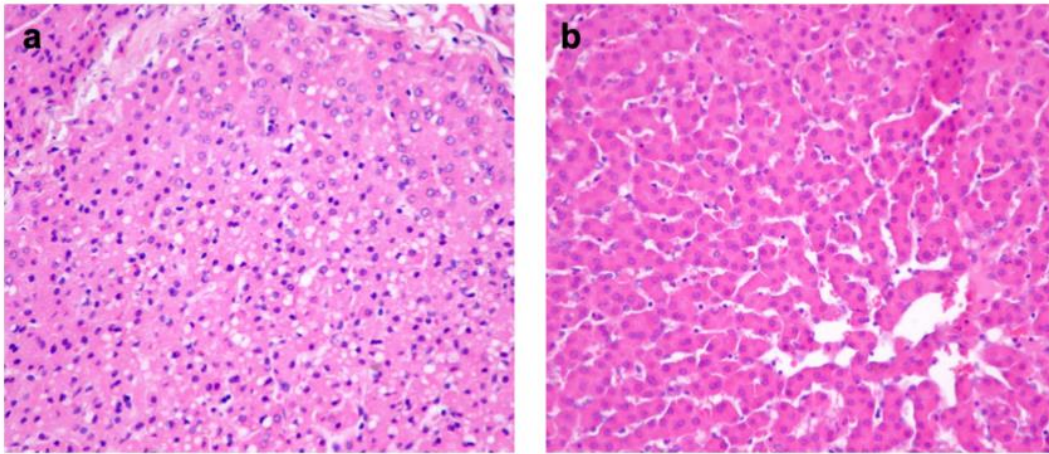

Representative images of morphological evaluations of liver tissue collected **a** before and **b** after the bioreactor-based perfusion procedure. **a** Absent necrosis and cholestasis, no sinusoidal dilatation (score 0); **b** Absent cholestasis (score 0), mild sinusoidal dilatation (score 1). Hematoxylin and eosin staining, original magnification: 20x

## 5. References

1. Debnath, T. & Chelluri, L. K. Standardization and quality assessment for clinical grade mesenchymal stem cells from human adipose tissue. *Hematol. Transfus. Cell Ther.* **41**, 7–16 (2019).
2. Smith, A. J., Clutton, R. E., Lilley, E., Hansen, K. E. A. & Brattelid, T. PREPARE: guidelines for planning animal research and testing. *Lab. Anim.* **52**, 135–141 (2018).
3. Balls, M. It's Time to Reconsider The Principles of Humane Experimental Technique. *ATLA Altern. to Lab. Anim.* **48**, 40–46 (2020).
4. Russell, W. M. S. & Burch, R. L. The Principles of Humane Experimental Technique. *Methuen Co., Ltd.* (1959) doi:10.1017/CBO9781107415324.004.
5. Merck KGaA. Size-based Immunomonitoring using the Scepter™ 3.0 Handheld Cell Counter. *Application note* <https://www.sigmaaldrich.com/IT/it/technical-documents/technical-article/cell-culture-and-cell-culture-analysis/cell-counting-and-health-analysis/size-based-immunomonitoring-scepter-handheld-cell-counter> (2023).
6. Hast, P. *Determination of NADH Concentrations with the Synergy™ 2 Multi-Detection Microplate Reader using Fluorescence or Absorbance.* (2007).
7. Meszaros, A. T. *et al.* Mitochondrial respiration during normothermic liver machine perfusion predicts clinical outcome. *EBioMedicine* **85**, (2022).
8. NC3R. Conducting a pilot study.
9. Bassani, G. A. *et al.* Ex vivo lung perfusion in the rat: Detailed procedure and videos. *PLoS One* **11**, (2016).
10. Dondossola, D. Procurement and ex-situ perfusion of isolated slaughterhouse-derived livers as a model of donors after circulatory death. *ALTEX* (2019) doi:10.14573/altex.1909131.
11. Dondossola, D. *et al.* Human Red Blood Cells as Oxygen Carriers to Improve Ex-Situ Liver Perfusion in a Rat Model. *J. Clin. Med.* (2019) doi:10.3390/jcm8111918.
